# Supplementary material for: Ligand-activated PPARγ downregulates CXCR4 gene expression through a novel identified PPAR response element and inhibits breast cancer progression
Source: PubMed Central journal article supplement (PMC5323141; doi:10.18632/oncotarget.11371), 2016-08-18
Supplement: oncotarget-07-65109-s001.pdf [file oncotarget-07-65109-s001.pdf]

# Ligand-activated PPAR $\gamma$ downregulates CXCR4 gene expression through a novel identified PPAR response element and inhibits breast cancer progression

## Supplementary Materials

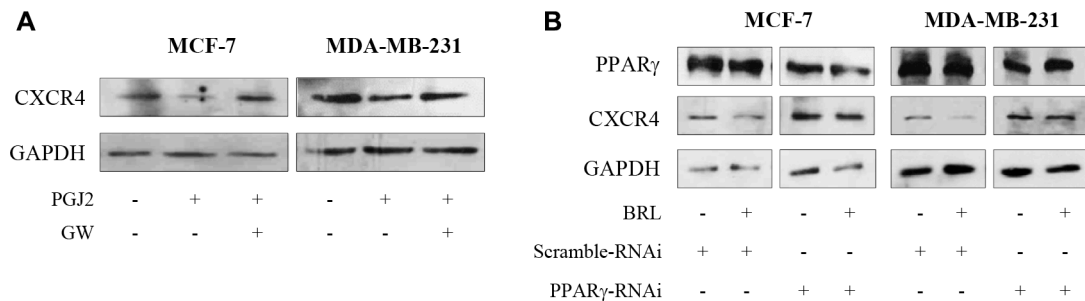

**Supplementary Figure S1:** (A) Immunoblots of CXCR4 protein expression in MCF-7 and MDA-MB-231 cells treated with vehicle (-), PGJ2 at 10  $\mu$ M with or without GW 10  $\mu$ M for 24 h. GAPDH was used as loading control. (B) Immunoblots of CXCR4 protein expression in MCF-7 and MDA-MB-231 cells transfected with scramble RNA interference (RNAi) or with PPAR $\gamma$  RNAi as reported in Materials and Methods Section and treated with vehicle (-) or with BRL 10  $\mu$ M for 24 h. GAPDH was used as loading control.

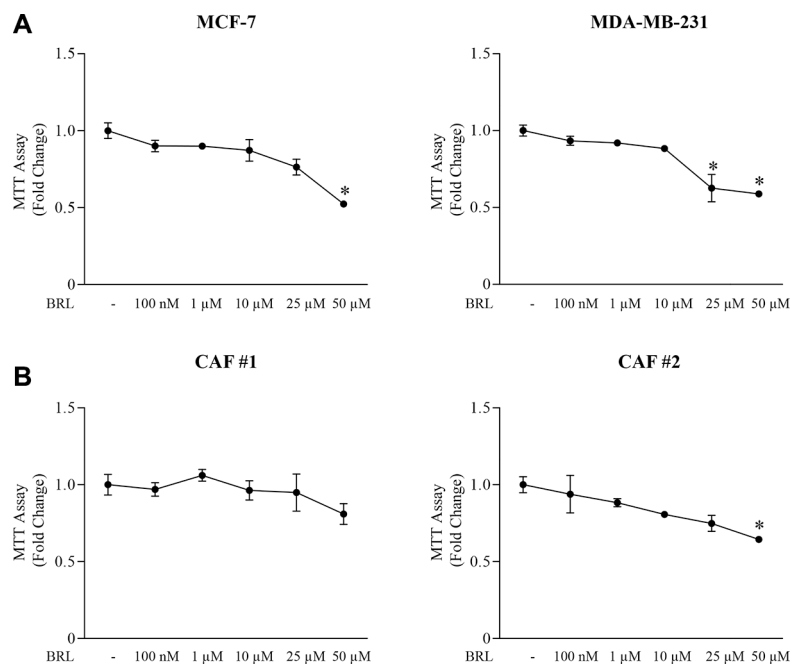

**Supplementary Figure S2:** Cell viability was determined by 3-(4,5-dimethylthiazol-2-yl)-2,5-diphenyltetrazolium (MTT) assays in MCF-7 and MDA-MB-231 breast cancer cells (A) and in Cancer-Associated Fibroblasts (CAF) (B) treated with vehicle (-) or with increasing concentrations (100 nM, 1, 10, 25, 50  $\mu$ M) of BRL for 24 h. The results are expressed as fold change respect to vehicle-treated cells. The values represent the mean  $\pm$  SD of three different experiments, each performed with triplicate samples. \* $P$  < 0.05 vs vehicle-treated cells.
